# Supplementary material
Source: PubMed Central journal article supplement (PMC6003870)

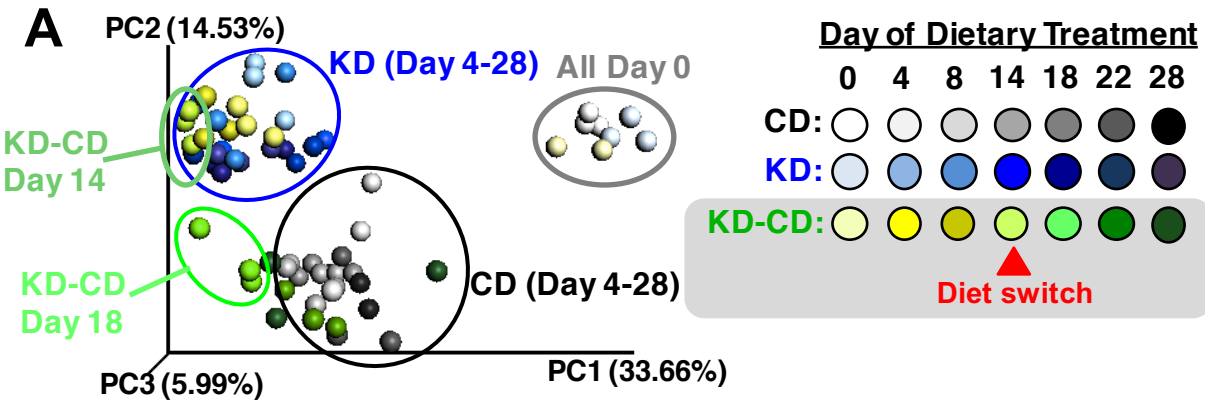

**AkkPb 4-day Probiotic Treatment (SPF CD + veh / AkkPb):**

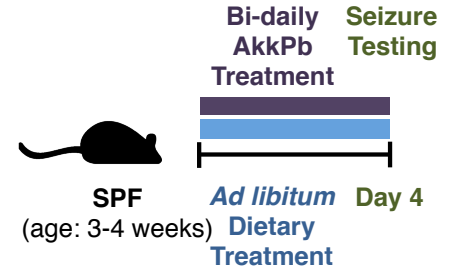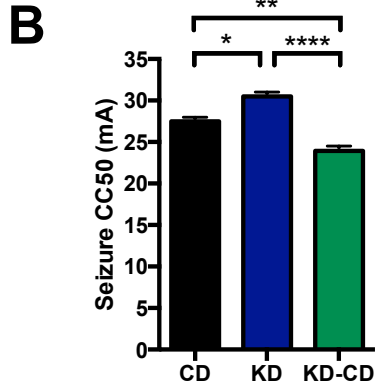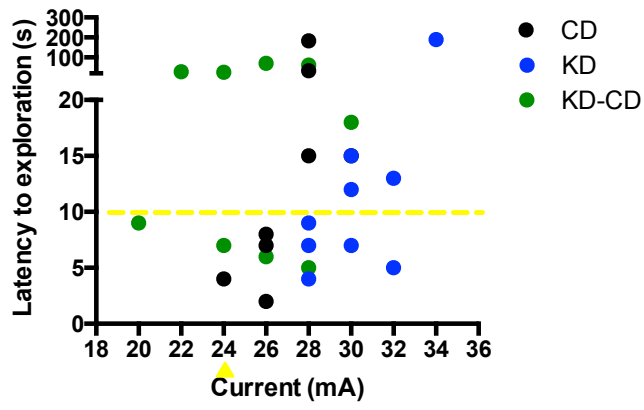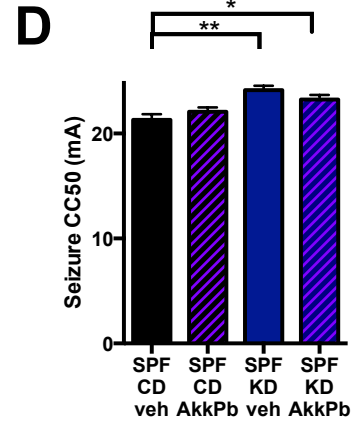

**C AkkPb 28-day Probiotic Treatment & 21-day Recovery (SPF CD + veh / AkkPb):**

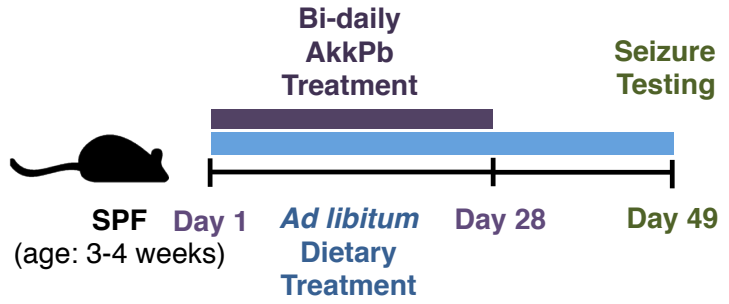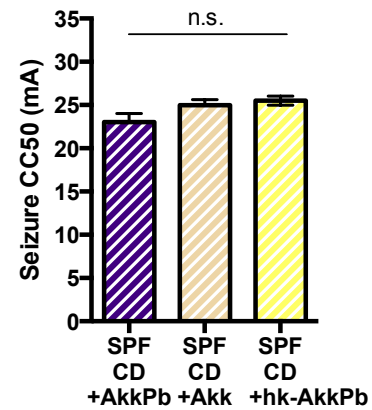

Supplement: NIHMS962831-supplement-4.pdf [file NIHMS962831-supplement-4.pdf]
