# Supplementary material
Source: PubMed Central journal article supplement (PMC6003870)

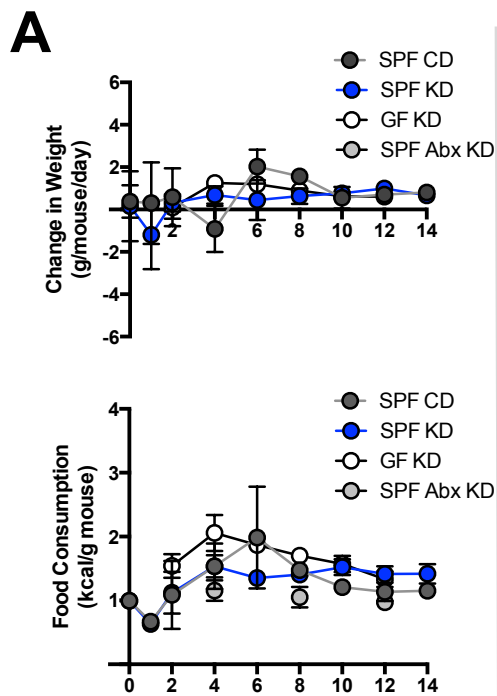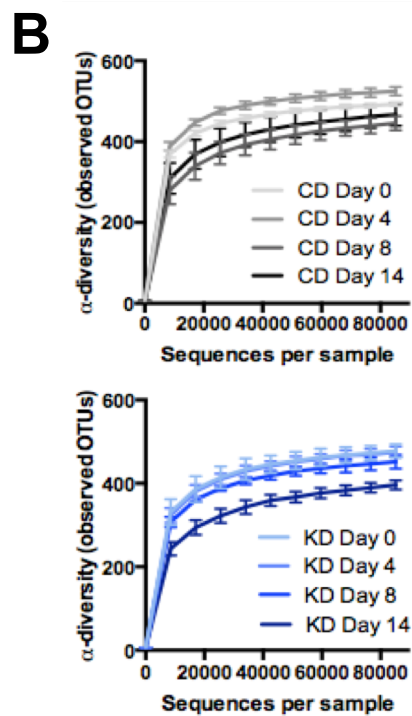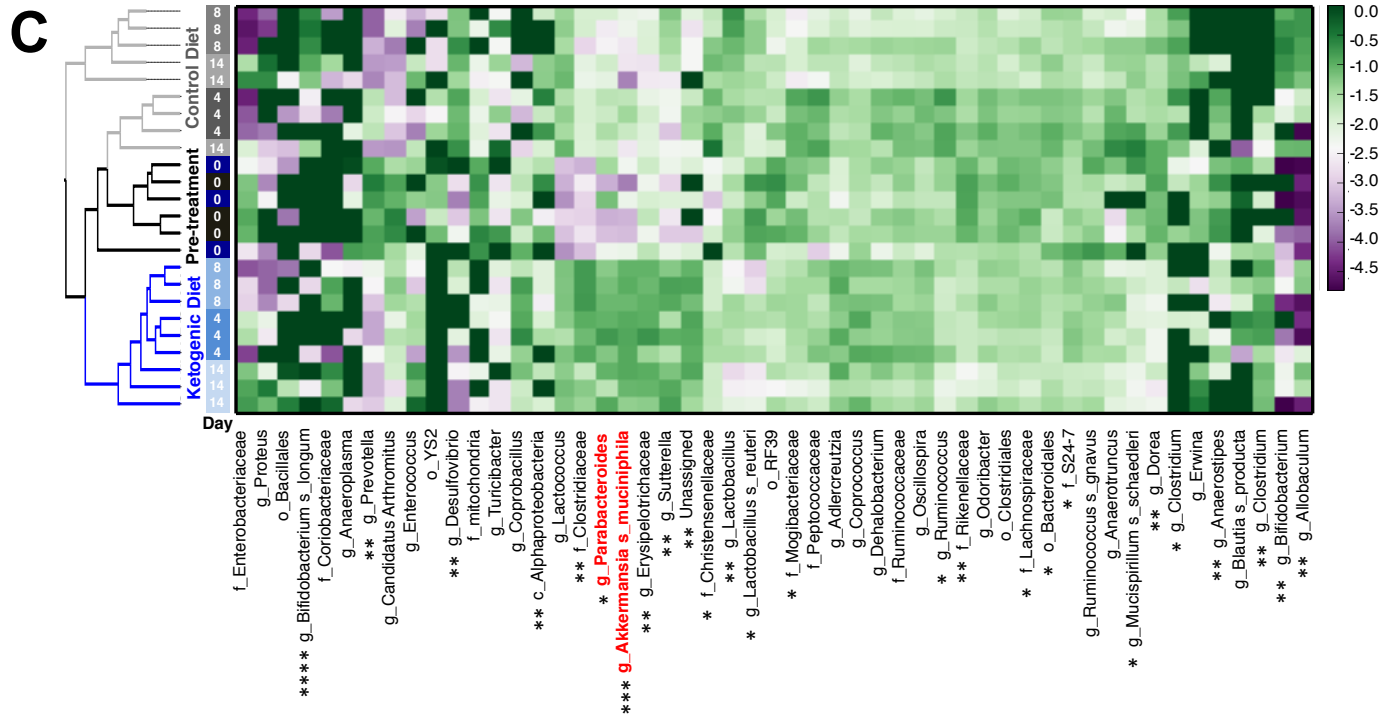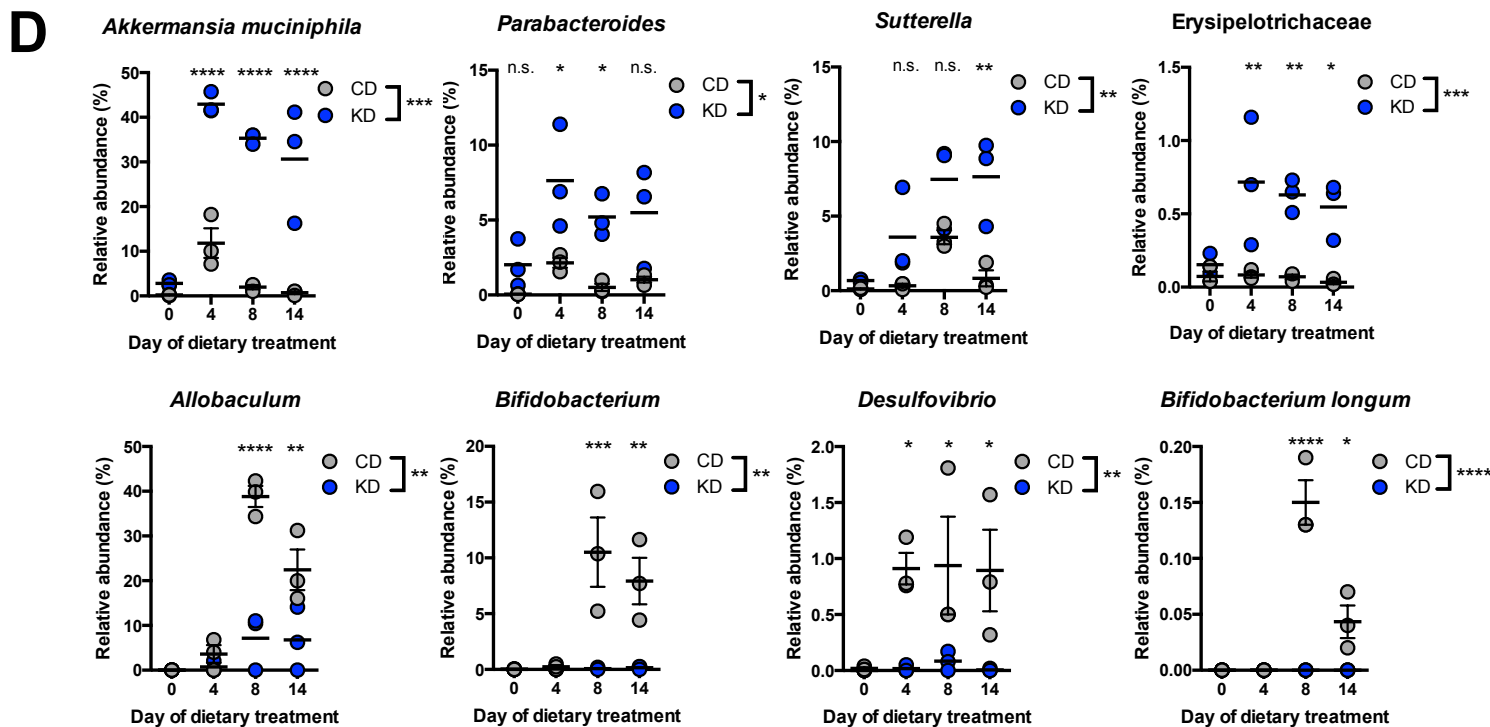

Supplement: NIHMS962831-supplement-1.pdf [file NIHMS962831-supplement-1.pdf]

**A**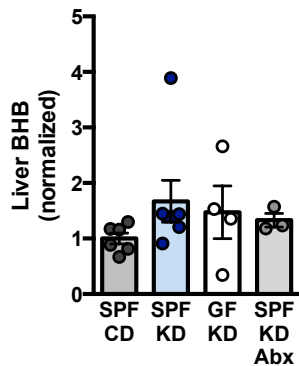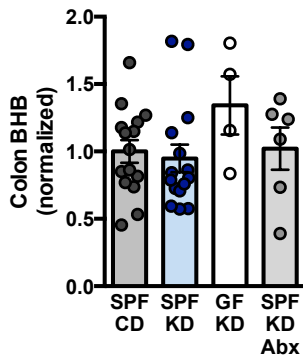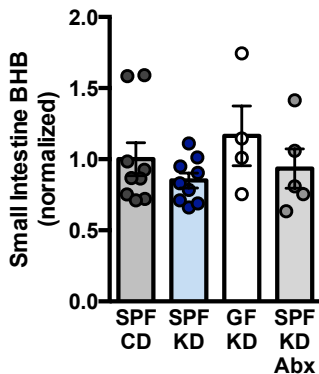**B**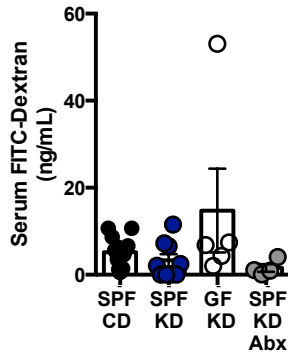**C**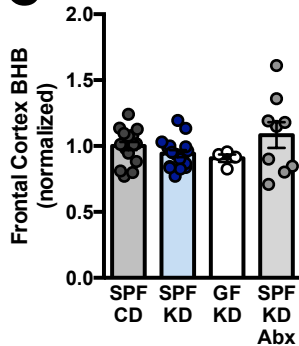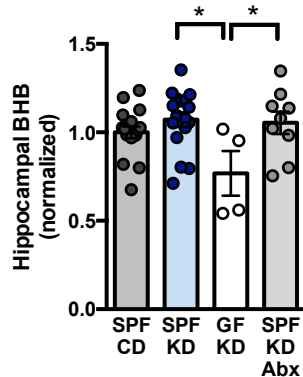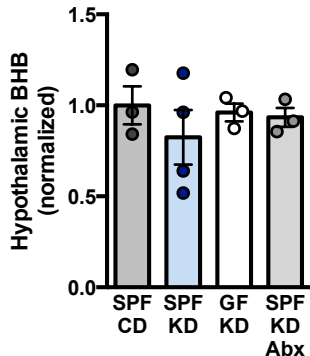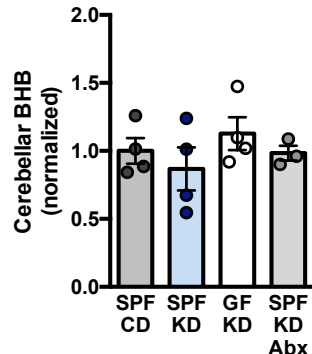

Supplement: NIHMS962831-supplement-2.pdf [file NIHMS962831-supplement-2.pdf]

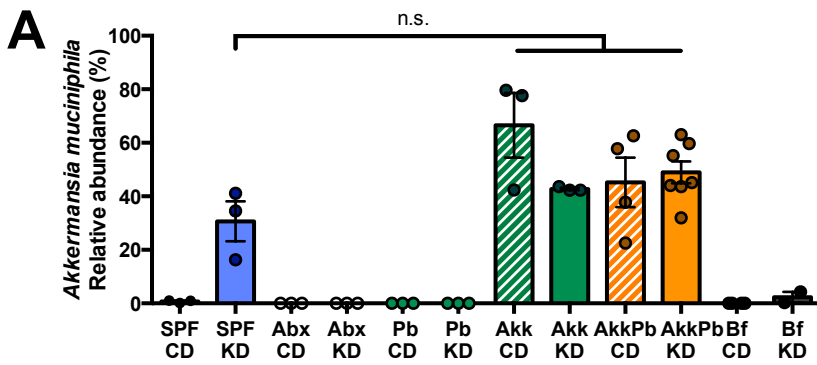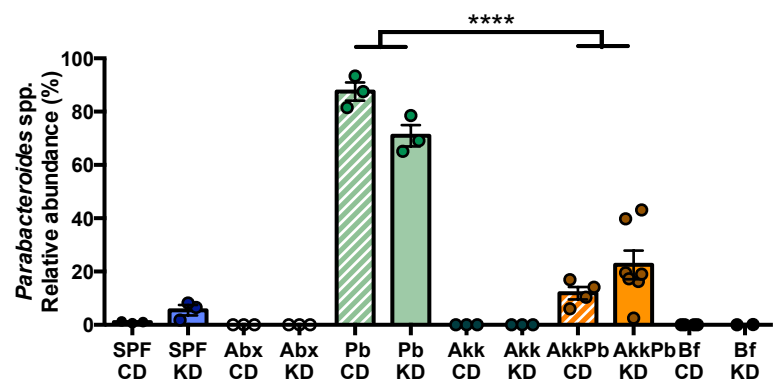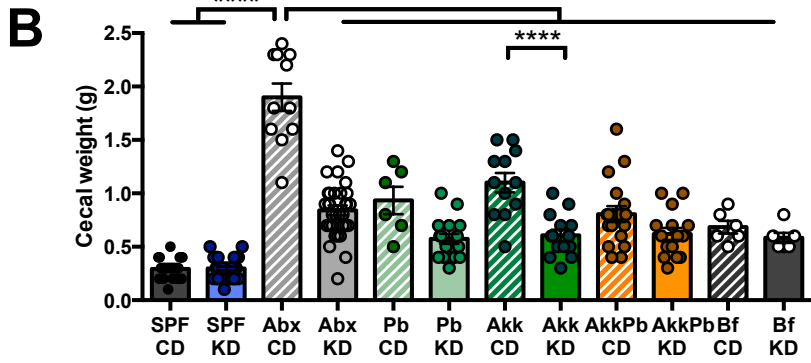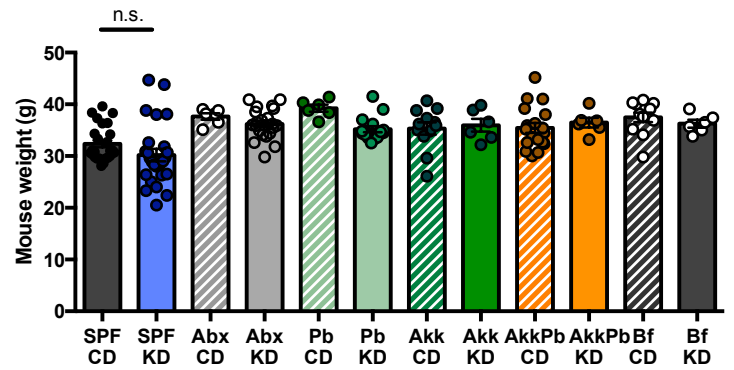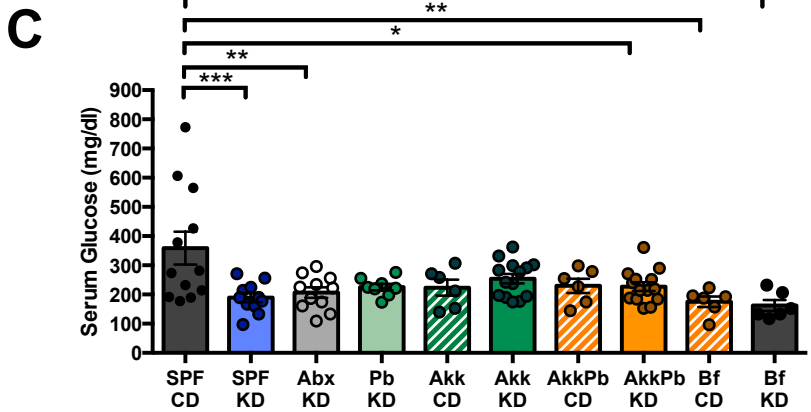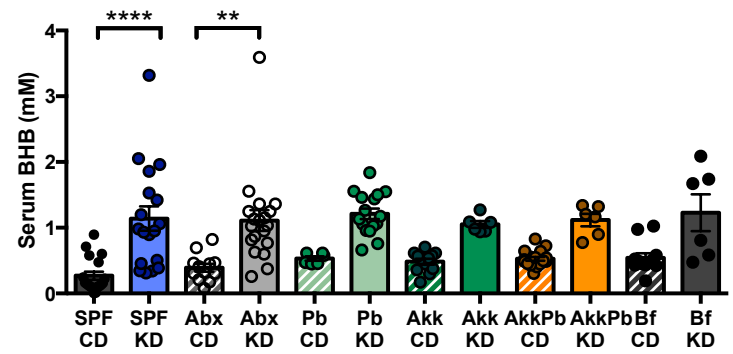

### Antibiotic Depletion & Bacterial Enrichment (SPF Abx + AkkPb / AkkPb(dist) / AkkPb(merd)):

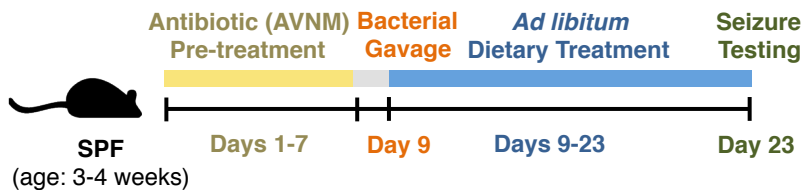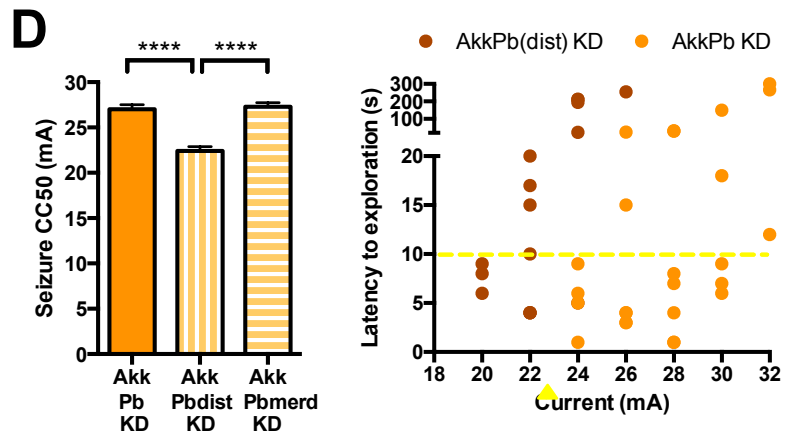

Supplement: NIHMS962831-supplement-3.pdf [file NIHMS962831-supplement-3.pdf]

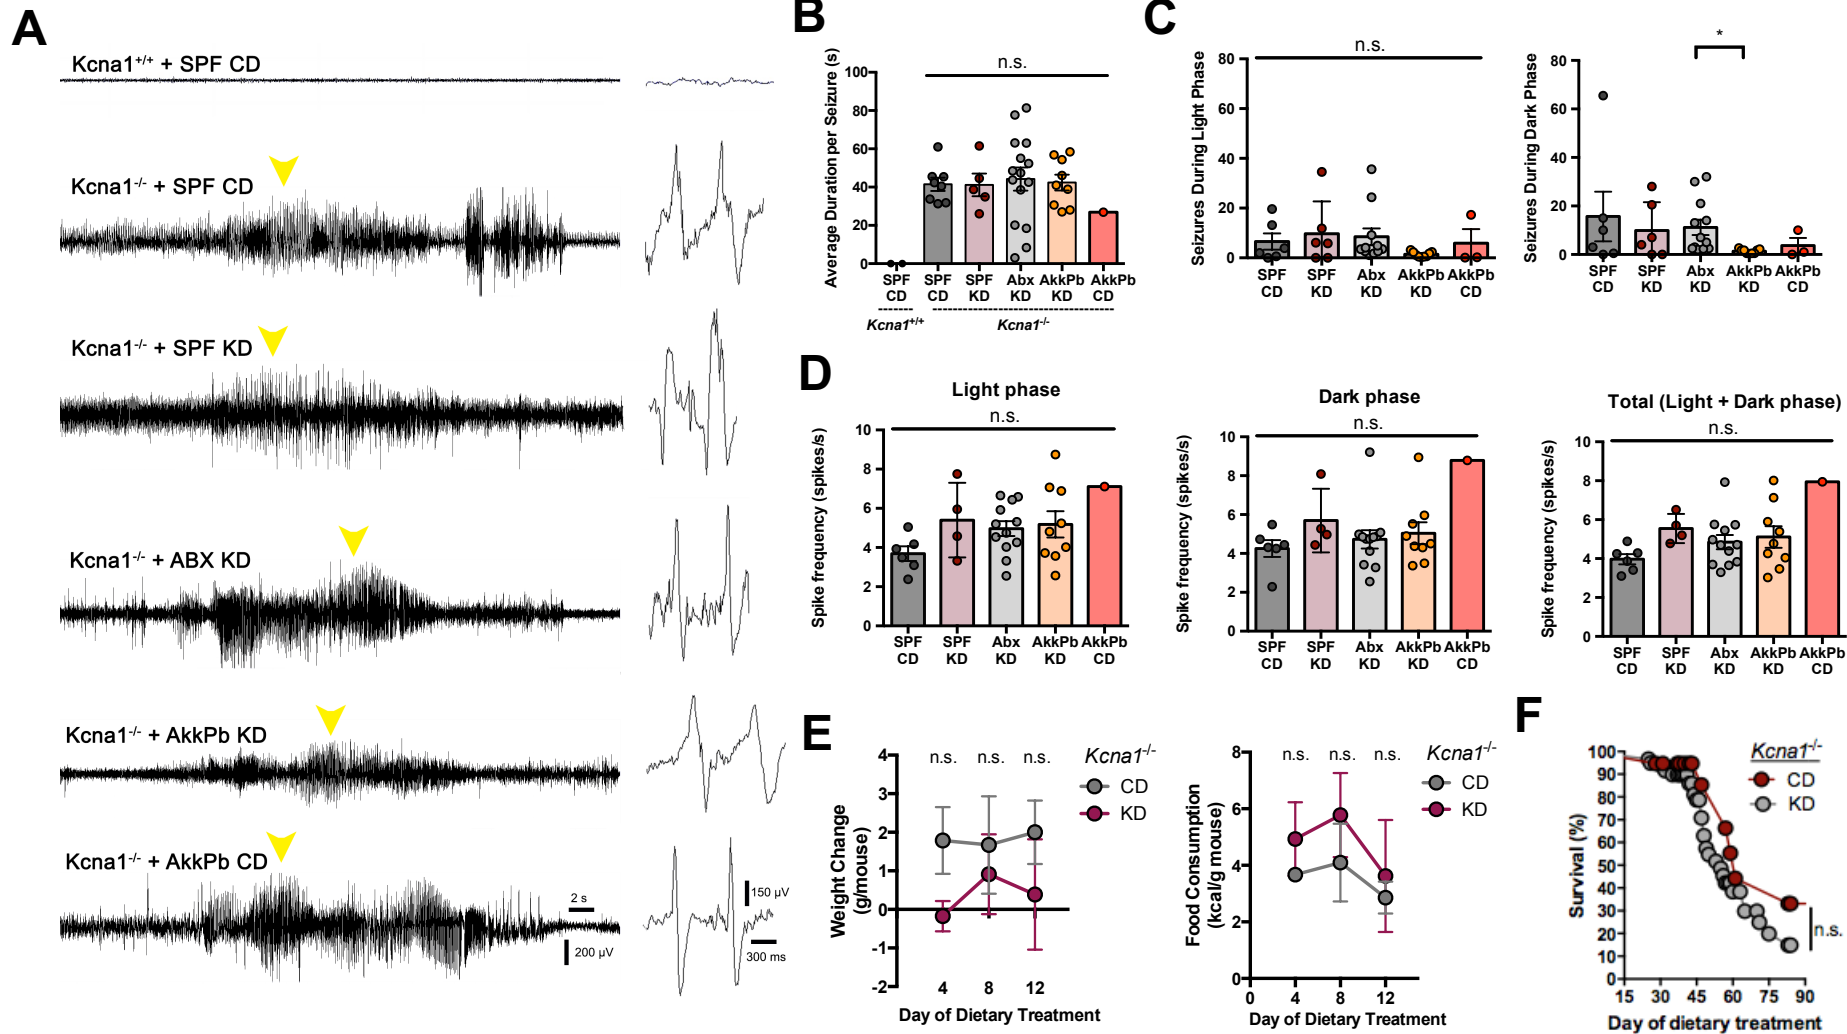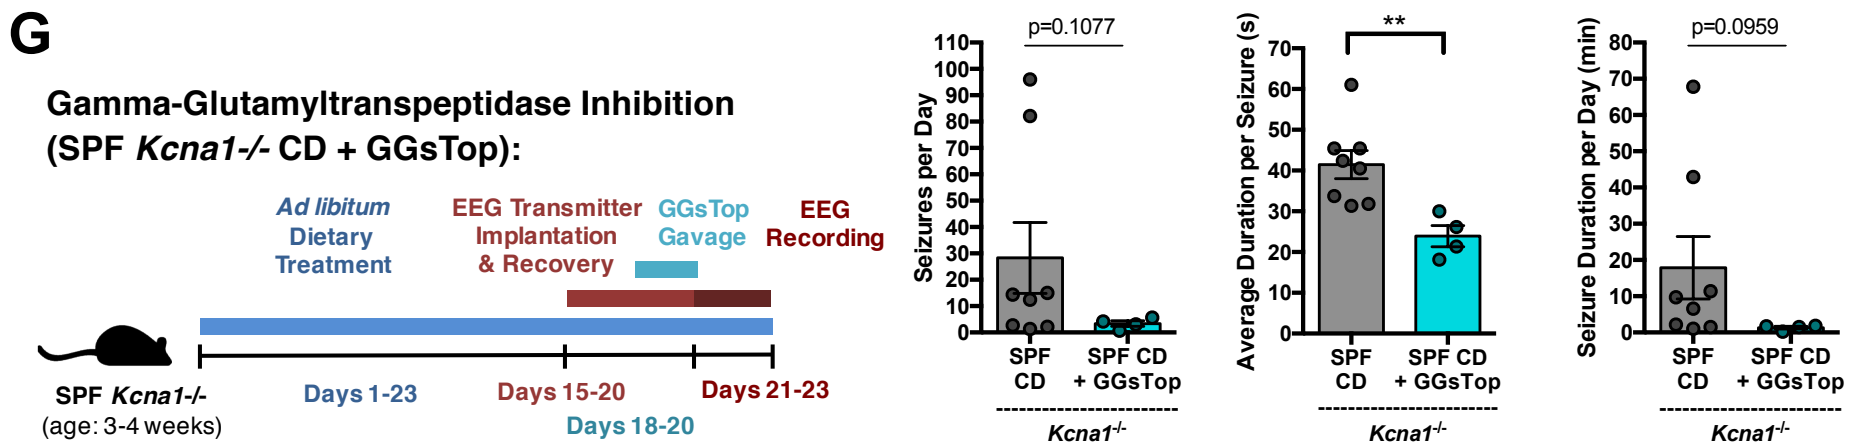

Supplement: NIHMS962831-supplement-5.pdf [file NIHMS962831-supplement-5.pdf]

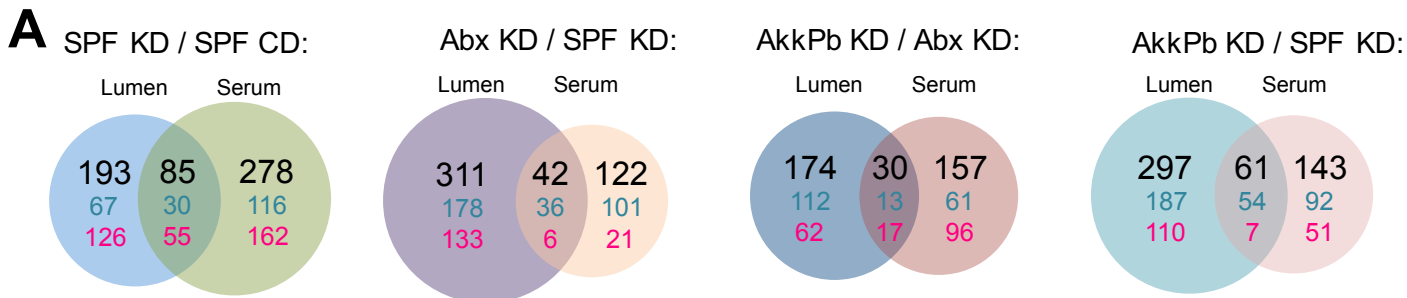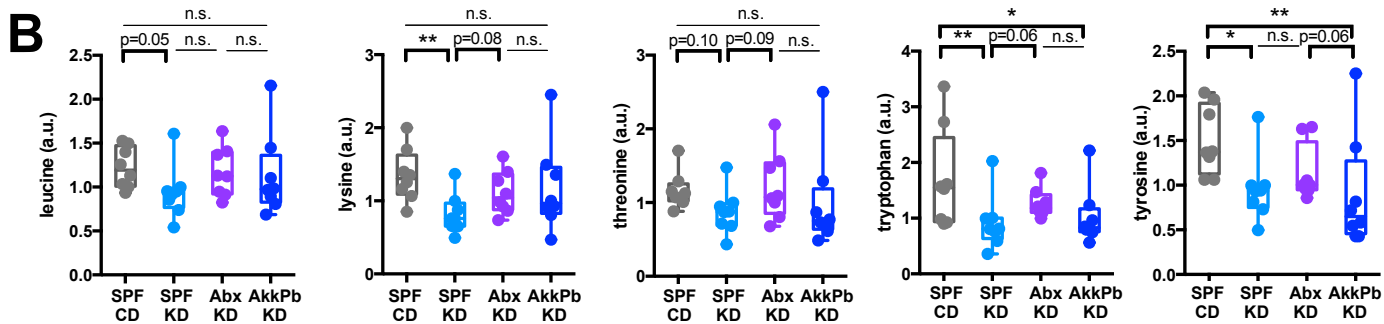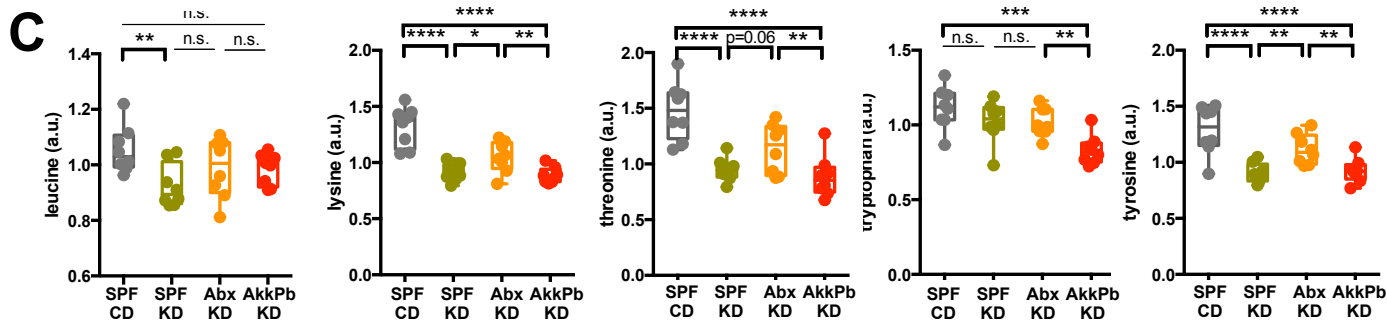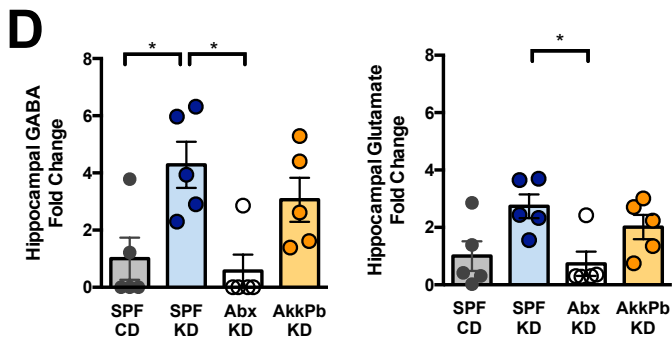

Supplement: NIHMS962831-supplement-6.pdf [file NIHMS962831-supplement-6.pdf]

**A**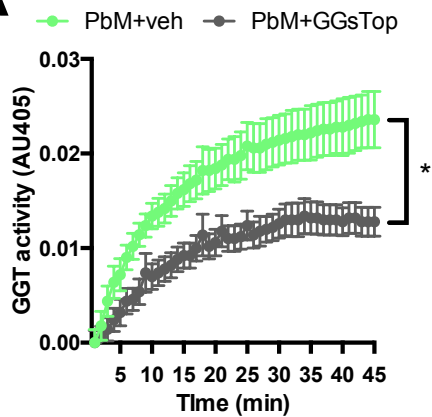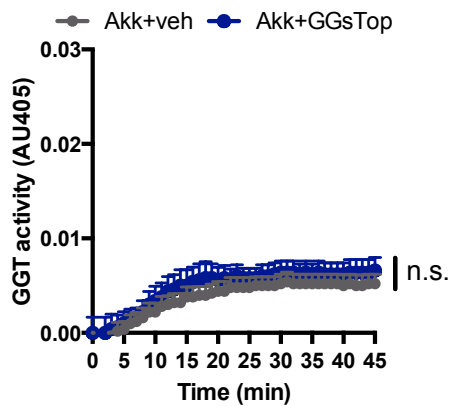**B**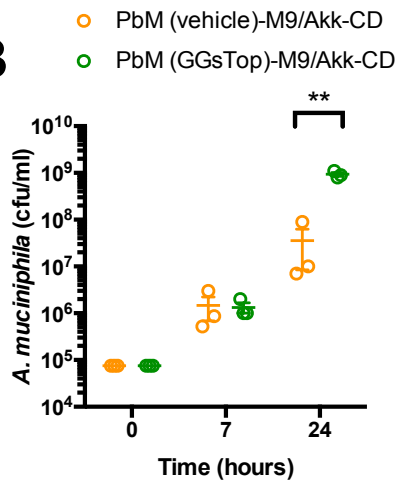

Supplement: NIHMS962831-supplement-7.pdf [file NIHMS962831-supplement-7.pdf]
